# Supplementary material
Source: publisher figshare collection journal article supplement (https://osapublishing.figshare.com/ndownloader/files/13152413)
Supplement: Supplementary file 1 [file 13152413]

# data of the dispersion curves of the refractive indices of [EMIM][BrI2] measured at three different temperatures
wavelength,n,k,n,k,n,k
[nm],,,,,,
,n_14°C,k_14°C,n_32°C,k_32°C,n_46°C,k_46°C
363.7,1.894671,0.345862,1.90342,0.318299,1.890894,0.313757
372.8,1.911916,0.355352,1.918285,0.328847,1.904685,0.322748
380,1.922183,0.328583,1.927203,0.303586,1.915099,0.296958
390.9,1.929184,0.313659,1.933954,0.288244,1.921743,0.282198
400.9,1.934421,0.283527,1.937953,0.259082,1.927163,0.25367
410.2,1.93694,0.260788,1.939092,0.235359,1.929251,0.230864
420.3,1.938856,0.236985,1.940379,0.213625,1.930272,0.207454
432.8,1.941061,0.205798,1.94069,0.183611,1.930972,0.178071
440.8,1.940371,0.184724,1.938642,0.163011,1.929788,0.158073
451.2,1.937258,0.15888,1.933586,0.13808,1.925601,0.13394
462,1.929287,0.133482,1.925607,0.115465,1.918151,0.111152
470.3,1.920512,0.115752,1.915555,0.09778,1.908516,0.093456
481.9,1.905576,0.094629,1.902425,0.079542,1.896043,0.075206
491.9,1.890872,0.080688,1.887627,0.065629,1.881535,0.06113
499.5,1.880009,0.072331,1.876332,0.057394,1.871391,0.053148
510.1,1.866968,0.064082,1.863431,0.049681,1.858335,0.044567
520.4,1.854477,0.057715,1.850963,0.043616,1.845385,0.037916
532.5,1.842408,0.051748,1.839209,0.039008,1.833728,0.03273
545.6,1.832073,0.047827,1.82793,0.033867,1.821756,0.028617
561.9,1.820242,0.042395,1.815481,0.029743,1.810424,0.02295
573.1,1.813394,0.040154,1.808767,0.027798,1.803621,0.021623
593.1,1.801882,0.035749,1.797482,0.024399,1.791848,0.017719
599.7,1.799258,0.034527,1.794357,0.023711,1.788221,0.017223
609.7,1.794356,0.033003,1.789244,0.021938,1.782857,0.015885
630.1,1.785971,0.029839,1.780677,0.019761,1.774529,0.013633
640.5,1.782016,0.029273,1.776965,0.019481,1.7698,0.013362
663.5,1.774014,0.027307,1.768924,0.017859,1.762323,0.01193
675.4,1.771002,0.027073,1.76532,0.017299,1.758171,0.011808
690.1,1.767285,0.02598,1.760553,0.016655,1.754308,0.010426
710.7,1.761107,0.024185,1.755654,0.015928,1.749068,0.009648
719.8,1.758924,0.024128,1.753423,0.015416,1.747053,0.010353
742.4,1.75517,0.023291,1.749166,0.015388,1.742497,0.009023
764.6,1.751576,0.022551,1.746105,0.015084,1.738788,0.009749
769.2,1.750353,0.022229,1.744818,0.015399,1.736712,0.007821
791.8,1.748364,0.02231,1.741042,0.014901,1.73393,0.007777
810,1.744008,0.018948,1.738189,0.013962,1.731545,0.007967
829.5,1.742221,0.019338,1.735717,0.013126,1.728933,0.007185
849.6,1.73948,0.017496,1.733882,0.01413,1.727059,0.008755
873,1.737434,0.017745,1.732094,0.013662,1.724013,0.008073
882.5,1.736862,0.018245,1.730056,0.012175,1.722975,0.007534
905.9,1.735334,0.017185,1.728654,0.011011,1.721895,0.005771
918.4,1.733829,0.018073,1.726904,0.010481,1.720115,0.005917
950.1,1.732611,0.019333,1.725393,0.01034,1.718518,0.002275
972.8,1.731435,0.018168,1.72498,0.011639,1.718171,-0.003872
995.9,1.729084,0.018406,1.724479,0.018615,1.716148,0.00723
